# Supplementary material
Source: HighWire-hosted journal article supplement (https://www.genetics.org/content/suppl/2011/11/18/genetics.111.135657)
Supplement: FigureS3.pdf [file FigureS3.pdf]

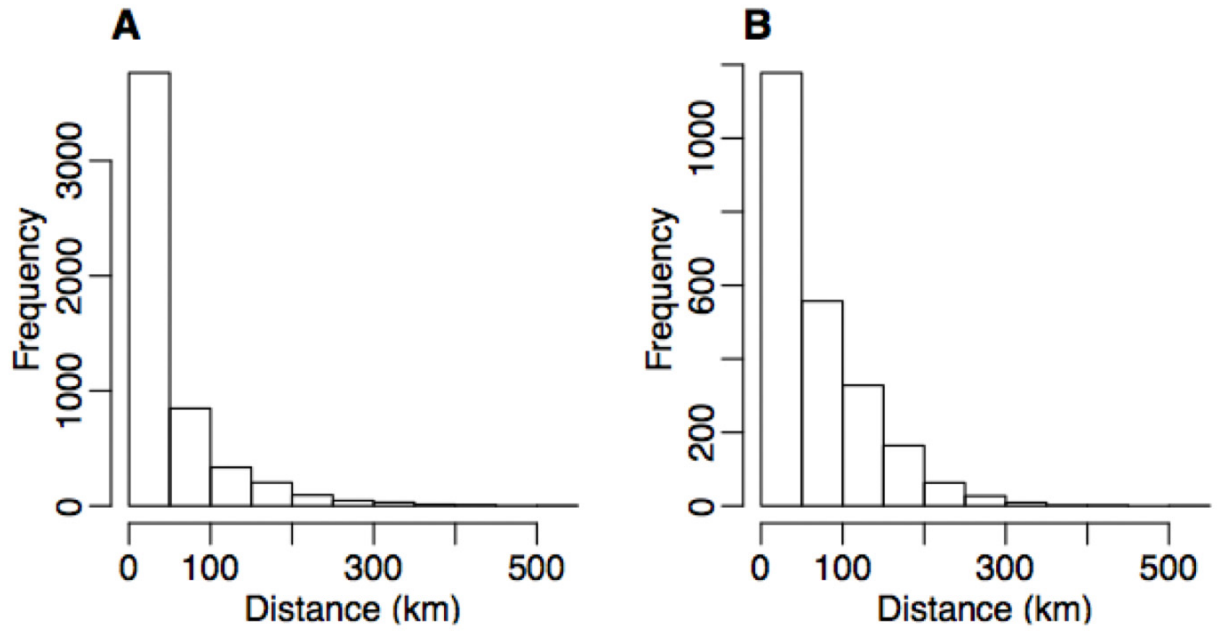

**Figure S3** Error distributions in the NFBC1966. Distribution of (A) difference between true and estimated parental birthplace and (B) difference between true and estimated most recent residence using the best-fitting pcLOCATE models.
